# Supplementary material
Source: ML conference proceedings conference paper supplement (https://aclanthology.org/2025.genaidetect-1.4)
Supplement: OptionalSupplementaryMaterial [file 2025.genaidetect-1.4.OptionalSupplementaryMaterial.pdf]

Dear Editor,

We are presenting our revised manuscript titled "**Benchmarking AI Text Detection: Assessing Detectors Against New Datasets, Evasion Tactics, and Enhanced LLMs**" for your consideration in the esteemed conference.

We would like to express our gratitude to the reviewers and the editor for taking the time to review our paper. Our revised submission has integrated the constructive feedback provided by the reviewers, resulting in an improved manuscript. We truly appreciate their valuable insights.

Please find attached the point-by-point response to the reviewers' comments. Thank you again for your time and consideration.

## Reviewer 1:

1. The cross-dataset problem is not really tested head on (using trained models with cross-dataset test sets) but only very indirectly concluded from different results on different datasets. This is of course not the same and should be explained more clearly in the paper (or called differently or even left out as it may lead to the wrong conclusion by readers).

- The testing of models of different datasets have been renamed as “out-of-distribution testing” rather than cross-dataset testing (Reference: <https://arxiv.org/html/2410.20964v1>).

2. The evasion strategies chosen are the simplest ones, which is fine, but adversarial prompting would be expected in the list as well.

- Added that under Limitation section.

3. The deterioration of performance on the newest models is only tested on few datapoints and not with all model variants.

- Increased data observations to 1,000 for each models.

## Reviewer 3:

1. The dataset with recent LLMs are extremely small.
  - Solved
2. minor writing issues. "Such detectors claim high evaluation metrics." -> metric is not the right term here " Chaka (Chaka, 2024) did aâ€;" -> Chaka (2023) did â€; (same problem exists in several parts.) "accuracies in this testing (?)." -> seems a missing reference "Difference of 8.9 % accuracy in the OpenAI detector model, 4.95 % in the RADAR model and 5.21 % in the ArguGPT model" -> incomplete sentence.
  - Solved

Regards,

Shushanta Pudasaini (Corresponding Author)

[D23129142@mytudublin.ie](mailto:D23129142@mytudublin.ie)
